# Supplementary material for: Surgical interventions for women with stress urinary incontinence: systematic review and network meta-analysis of randomised controlled trials
Source: PubMed Central journal article supplement — BMJ. 2019 Jun 5;365:l1842. doi: 10.1136/bmj.l1842 (PMC6549286; doi:10.1136/bmj.l1842), 2019-06-05
Supplement: imam048205.ww2.pdf [file imam048205.ww2.pdf]

**Appendix 2 Network meta-analysis: inconsistency analysis and node-splitting analysis for total number of women cured or improved**

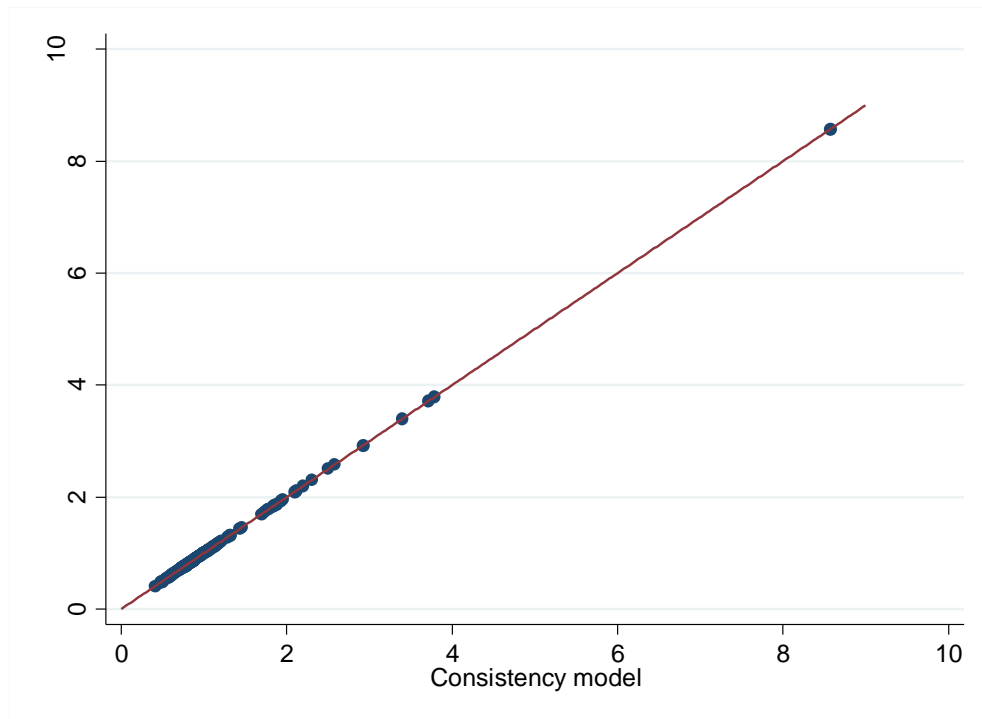

**Figure 1 Plot of the individual data points' posterior mean deviance contributions for the consistency and inconsistency model along with the line of equality for the number of women cured**

**Table 1 Summary of node splitting analysis for cure of incontinence symptoms on the log scale**

|                                                | NMA    |                  | Direct |                  | Indirect |                  | Inconsistency estimate |                 | P     |
|------------------------------------------------|--------|------------------|--------|------------------|----------|------------------|------------------------|-----------------|-------|
|                                                | median | 95% CrI          | median | 95% CrI          | median   | 95% CrI          | median                 | 95% CrI         |       |
| Transob MUS vs retro MUS                       | -0.304 | (-0.532, -0.080) | -0.240 | (-0.485, 0.006)  | -0.658   | (-1.224, -0.102) | 0.417                  | (-0.182, 1.035) | 0.170 |
| Open colpo vs retro MUS                        | -0.159 | (-0.609, 0.281)  | -0.036 | (-0.586, 0.522)  | -0.370   | (-1.134, 0.382)  | 0.335                  | (-0.593, 1.270) | 0.476 |
| Lap colpo vs retro MUS                         | -0.545 | (-1.157, 0.045)  | -1.057 | (-2.406, 0.182)  | -0.409   | (-1.088, 0.274)  | -0.652                 | (-2.171, 0.780) | 0.370 |
| Trad sling vs retro MUS                        | 0.059  | (-0.473, 0.613)  | -0.061 | (-0.638, 0.531)  | 0.945    | (-0.574, 2.696)  | -1.007                 | (-2.823, 0.630) | 0.230 |
| Single incision vs retro MUS                   | -0.686 | (-1.022, -0.358) | -0.948 | (-1.534, -0.383) | -0.543   | (-0.954, -0.145) | -0.406                 | (-1.109, 0.294) | 0.250 |
| Open colpo vs transob MUS                      | 0.145  | (-0.332, 0.619)  | -0.127 | (-1.658, 1.371)  | 0.174    | (-0.330, 0.679)  | -0.300                 | (-1.914, 1.284) | 0.708 |
| Trad sling vs transob MUS                      | 0.363  | (-0.206, 0.962)  | 0.901  | (-1.913, 4.506)  | 0.353    | (-0.238, 0.964)  | 0.547                  | (-2.333, 4.198) | 0.720 |
| Single incision vs transob MUS                 | -0.380 | (-0.672, -0.098) | -0.343 | (-0.666, -0.023) | -0.513   | (-1.191, 0.148)  | 0.170                  | (-0.559, 0.915) | 0.652 |
| Anterior repair vs transob MUS                 | -0.775 | (-1.580, 0.023)  | -0.723 | (-2.313, 0.825)  | -1.359   | (-2.202, -0.531) | 0.634                  | (-1.162, 2.412) | 0.482 |
| PFMT vs transob MUS                            | -1.211 | (-1.953, -0.473) | -1.623 | (-2.756, -0.496) | -2.610   | (-5.073, -0.546) | 1.000                  | (-1.358, 3.685) | 0.420 |
| Lap colpo vs open colpo                        | -1.813 | (-2.817, -0.847) | -0.315 | (-0.811, 0.185)  | -0.952   | (-2.358, 0.378)  | 0.640                  | (-0.779, 2.125) | 0.380 |
| Trad sling vs open colpo                       | -0.388 | (-0.857, 0.077)  | 1.320  | (-0.088, 2.986)  | -0.060   | (-0.786, 0.665)  | 1.388                  | (-0.199, 3.180) | 0.088 |
| Bladder neck needle vs open colpo              | 0.218  | (-0.420, 0.895)  | -0.909 | (-1.619, -0.208) | 0.264    | (-3.859, 4.079)  | -1.171                 | (-5.064, 3.008) | 0.530 |
| Anterior repair vs open colpo                  | -1.356 | (-1.983, -0.739) | -1.531 | (-2.245, -0.850) | -0.815   | (-2.497, 0.820)  | -0.716                 | (-2.487, 1.096) | 0.424 |
| PFMT vs open colpo                             | -1.957 | (-3.018, -0.940) | -2.697 | (-5.173, -0.661) | -1.734   | (-2.977, -0.499) | -0.979                 | (-3.699, 1.425) | 0.434 |
| Bladder neck needle vs trad sling              | -1.141 | (-2.067, -0.237) | 0.008  | (-3.834, 3.861)  | -1.239   | (-2.205, -0.316) | 1.247                  | (-2.678, 5.221) | 0.506 |
| Anterior vaginal repair vs bladder neck needle | -0.437 | (-1.190, 0.304)  | -0.162 | (-1.060, 0.737)  | -0.784   | (-1.900, 0.313)  | 0.621                  | (-0.729, 1.992) | 0.368 |

P: Bayesian p-value

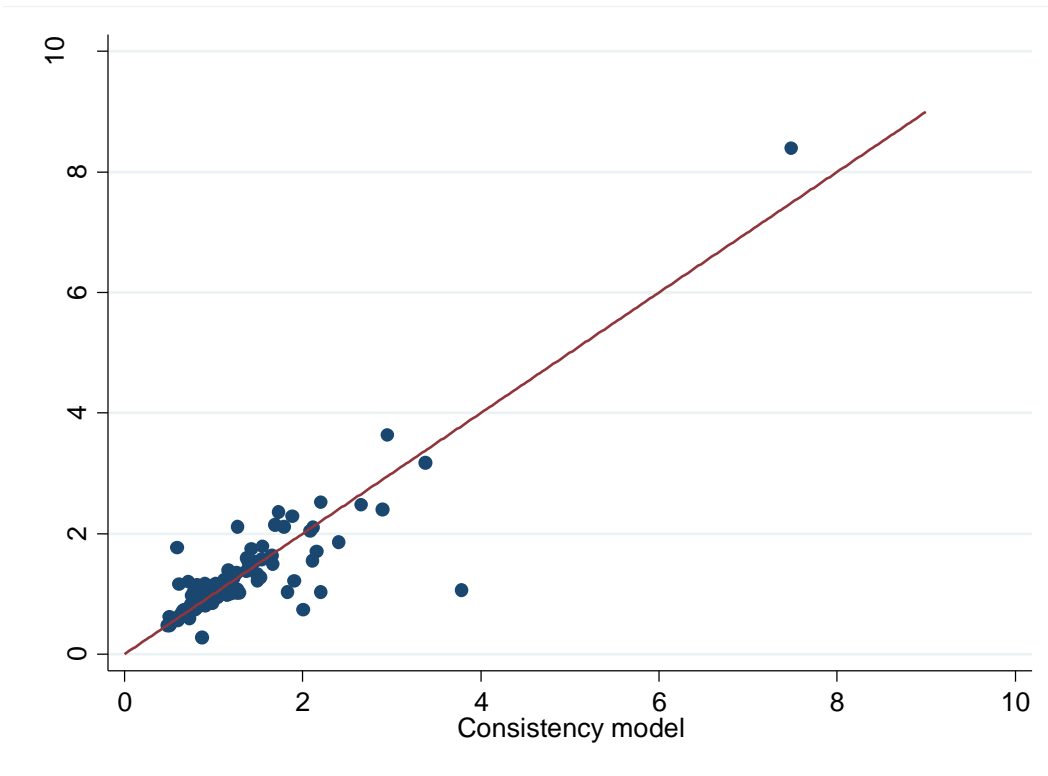

**Figure 2** Plot of the individual data point's posterior mean deviance contributions for the consistency and inconsistency model along with the line of equality for the number of women improved

**Table 2 Summary of node splitting analysis for improvement of incontinence symptoms on the log scale**

|                                                | NMA    |                  | Direct |                  | Indirect |                  | Inconsistency estimate |                  | median |
|------------------------------------------------|--------|------------------|--------|------------------|----------|------------------|------------------------|------------------|--------|
|                                                | median | 95% CrI          | median | 95% CrI          | median   |                  | median                 | 95% CrI          |        |
| Transob MUS vs retro MUS                       | -0.279 | (-0.532, -0.023) | -0.236 | (-0.513, 0.043)  | -0.460   | (-1.070, 0.134)  | 0.223                  | (-0.426, 0.888)  | 0.498  |
| Open colpo vs retro MUS                        | -0.436 | (-0.894, 0.021)  | -0.152 | (-0.750, 0.464)  | -0.806   | (-1.536, -0.104) | 0.655                  | (-0.265, 1.611)  | 0.160  |
| Lap colpo vs retro MUS                         | -0.653 | (-1.230, -0.092) | -0.761 | (-1.633, 0.093)  | -0.575   | (-1.349, 0.201)  | -0.187                 | (-1.350, 0.974)  | 0.750  |
| Trad sling vs retro MUS                        | -0.372 | (-0.947, 0.230)  | -0.405 | (-1.101, 0.297)  | -0.265   | (-1.345, 0.867)  | -0.141                 | (-1.466, 1.151)  | 0.828  |
| Single incision vs retro MUS                   | -0.688 | (-1.050, -0.340) | -1.118 | (-1.806, -0.456) | -0.498   | (-0.921, -0.076) | -0.618                 | (-1.419, 0.155)  | 0.116  |
| Open colpo vs transob MUS                      | -0.158 | (-0.662, 0.347)  | -0.113 | (-1.785, 1.524)  | -0.160   | (-0.683, 0.372)  | 0.043                  | (-1.697, 1.762)  | 0.960  |
| Trad sling vs transob MUS                      | -0.094 | (-0.707, 0.540)  | 0.924  | (-2.022, 4.706)  | -0.134   | (-0.761, 0.512)  | 1.057                  | (-1.947, 4.900)  | 0.498  |
| Single incision vs transob MUS                 | -0.410 | (-0.712, -0.115) | -0.366 | (-0.704, -0.040) | -0.657   | (-1.408, 0.081)  | 0.290                  | (-0.526, 1.101)  | 0.478  |
| Anterior repair vs transob MUS                 | -1.442 | (-2.253, -0.641) | -0.013 | (-1.842, 1.825)  | -1.775   | (-2.662, -0.902) | 1.762                  | (-0.283, 3.806)  | 0.088  |
| PFMT vs transob MUS                            | -0.580 | (-1.662, 0.575)  | -1.712 | (-2.925, -0.506) | 2.346    | (0.321, 4.583)   | -4.060                 | (-6.629, -1.701) | 0.002  |
| Lap colpo vs open colpo                        | -0.217 | (-0.722, 0.271)  | -0.174 | (-0.747, 0.392)  | -0.379   | (-1.391, 0.624)  | 0.203                  | (-0.946, 1.357)  | 0.728  |
| Trad sling vs open colpo                       | 0.063  | (-0.614, 0.767)  | 1.383  | (-0.094, 3.158)  | -0.318   | (-1.093, 0.455)  | 1.709                  | (0.047, 3.611)   | 0.044  |
| Bladder neck needle vs open colpo              | -0.962 | (-1.697, -0.216) | -0.971 | (-1.774, -0.190) | 0.105    | (-3.731, 4.202)  | -1.078                 | (-5.268, 2.843)  | 0.566  |
| Anterior repair vs open colpo                  | -1.286 | (-1.976, -0.607) | -1.571 | (-2.336, -0.841) | 0.268    | (-1.636, 2.208)  | -1.846                 | (-3.921, 0.196)  | 0.076  |
| PFMT vs open colpo                             | -0.419 | (-1.545, 0.772)  | 2.342  | (0.376, 4.511)   | -1.723   | (-3.036, -0.430) | 4.080                  | (1.679, 6.591)   | <0.001 |
| Single incision vs trad sling                  | -0.317 | (-0.986, 0.327)  | 0.676  | (-0.911, 2.298)  | -0.518   | (-1.247, 0.196)  | 1.192                  | (-0.552, 3.004)  | 0.178  |
| Bladder neck needle vs trad sling              | -1.026 | (-2.019, -0.056) | -0.007 | (-3.975, 3.989)  | -1.117   | (-2.145, -0.098) | 1.106                  | (-2.974, 5.199)  | 0.558  |
| Anterior vaginal repair vs bladder neck needle | -0.322 | (-1.168, 0.489)  | -0.141 | (-1.156, 0.882)  | -0.482   | (-1.712, 0.736)  | 0.340                  | (-1.177, 1.881)  | 0.654  |
