# Supplementary material for: Surgical interventions for women with stress urinary incontinence: systematic review and network meta-analysis of randomised controlled trials
Source: PubMed Central journal article supplement — BMJ. 2019 Jun 5;365:l1842. doi: 10.1136/bmj.l1842 (PMC6549286; doi:10.1136/bmj.l1842), 2019-06-05
Supplement: imam048205.ww3.pdf [file imam048205.ww3.pdf]

**Appendix 3**

**Meta-analysis results for secondary outcomes**

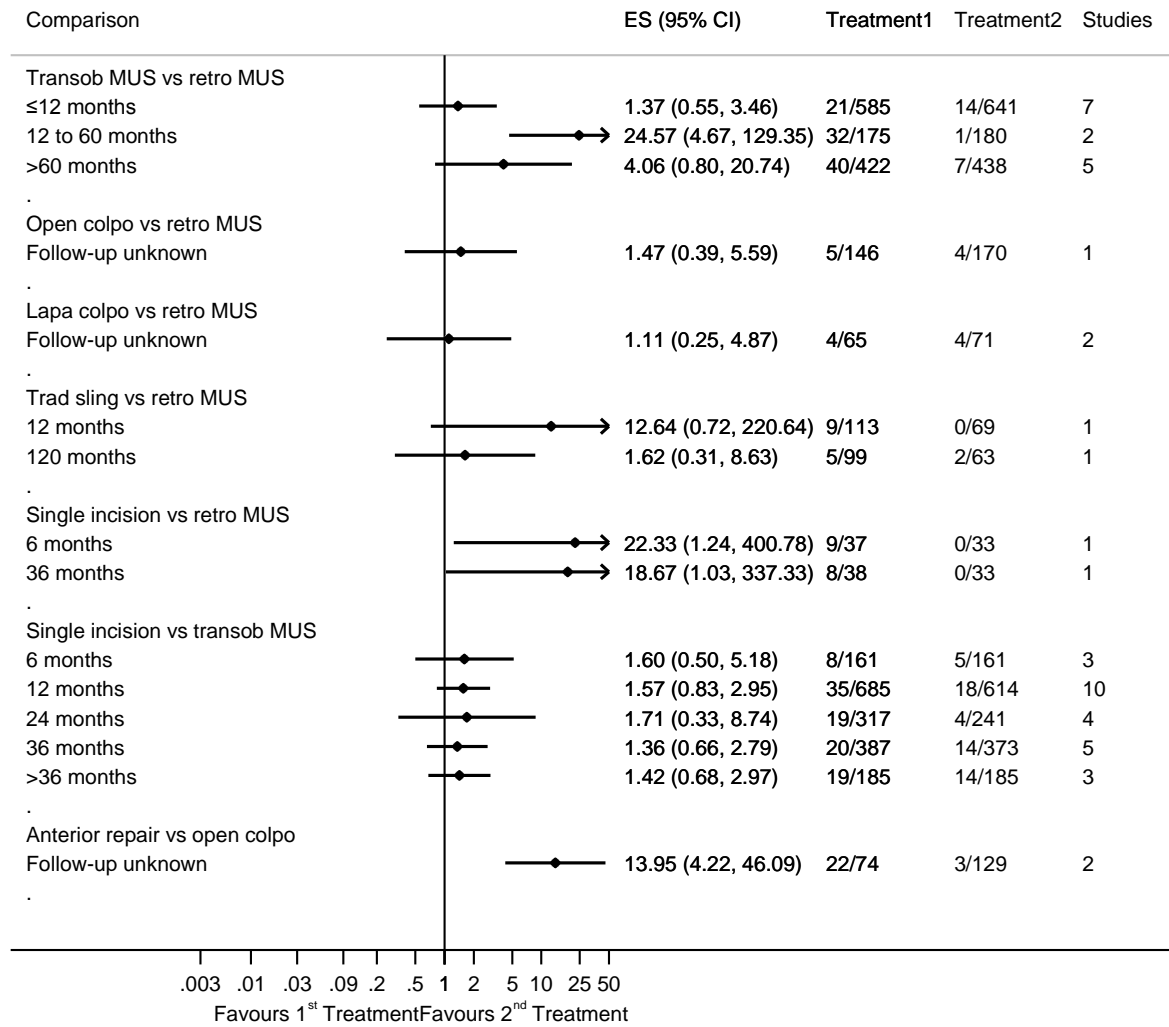

**Figure 1** Meta-analysis for repeat surgery

(Effect estimate [ES] = Odds ratio)

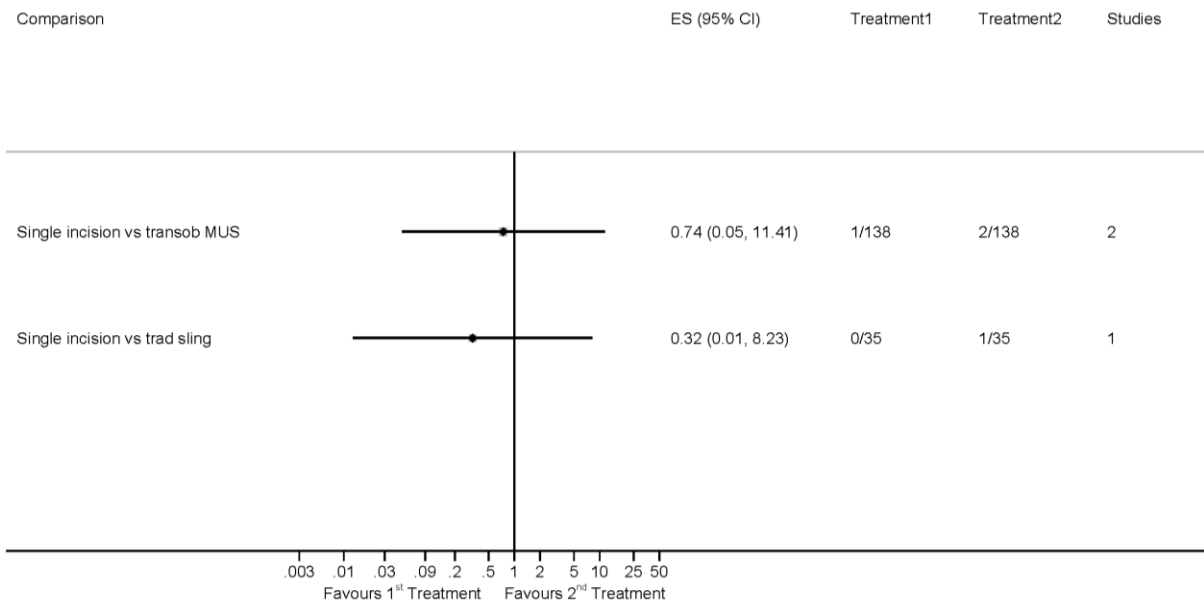

**Figure 2 Meta-analysis for haemorrhage**

(Effect estimate [ES] = Odds ratio)

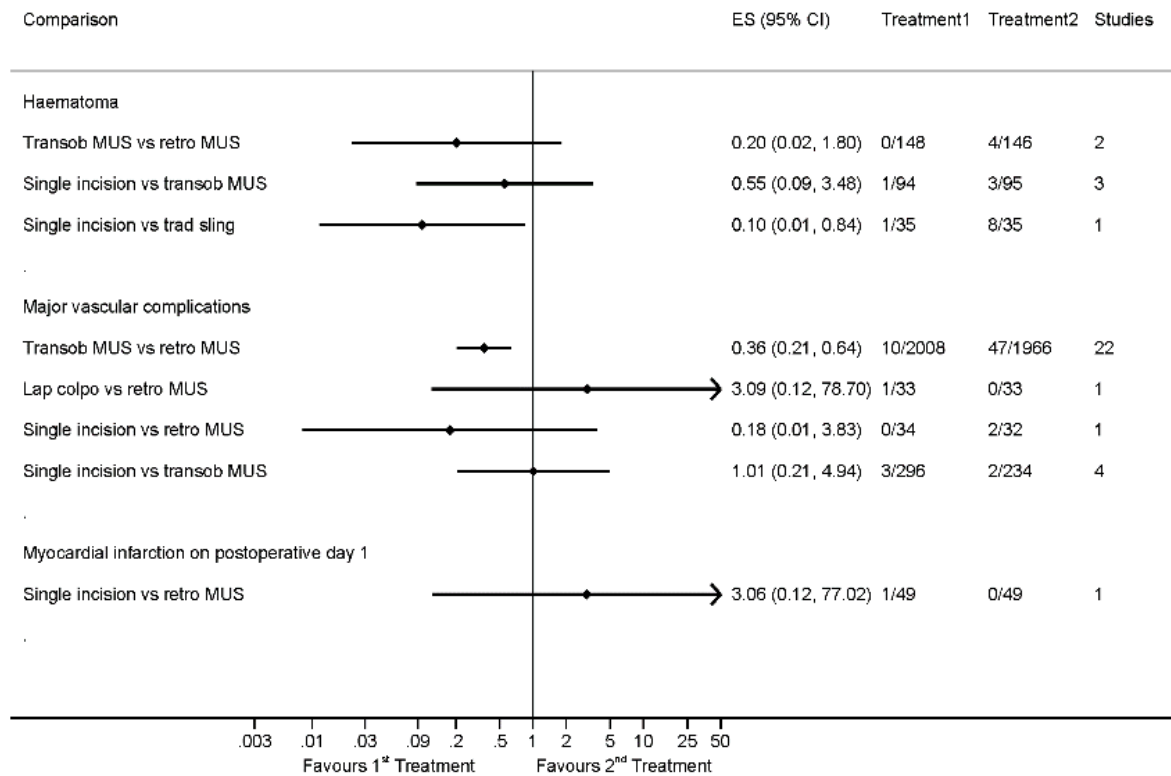

**Figure 3 Meta-analysis for haematoma, major vascular complications, and myocardial infarction**

(Effect estimate [ES] = Odds ratio)

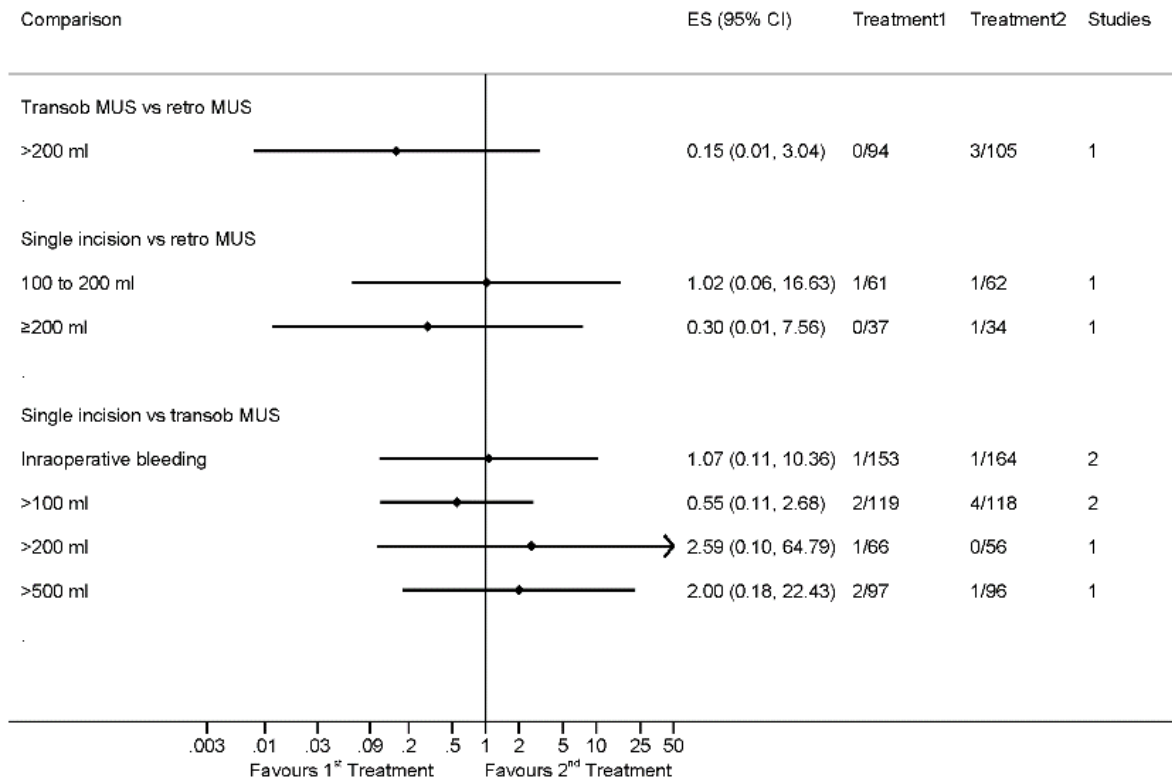

**Figure 4 Meta-analysis for bleeding**

**(Effect estimate [ES] = Odds ratio)**

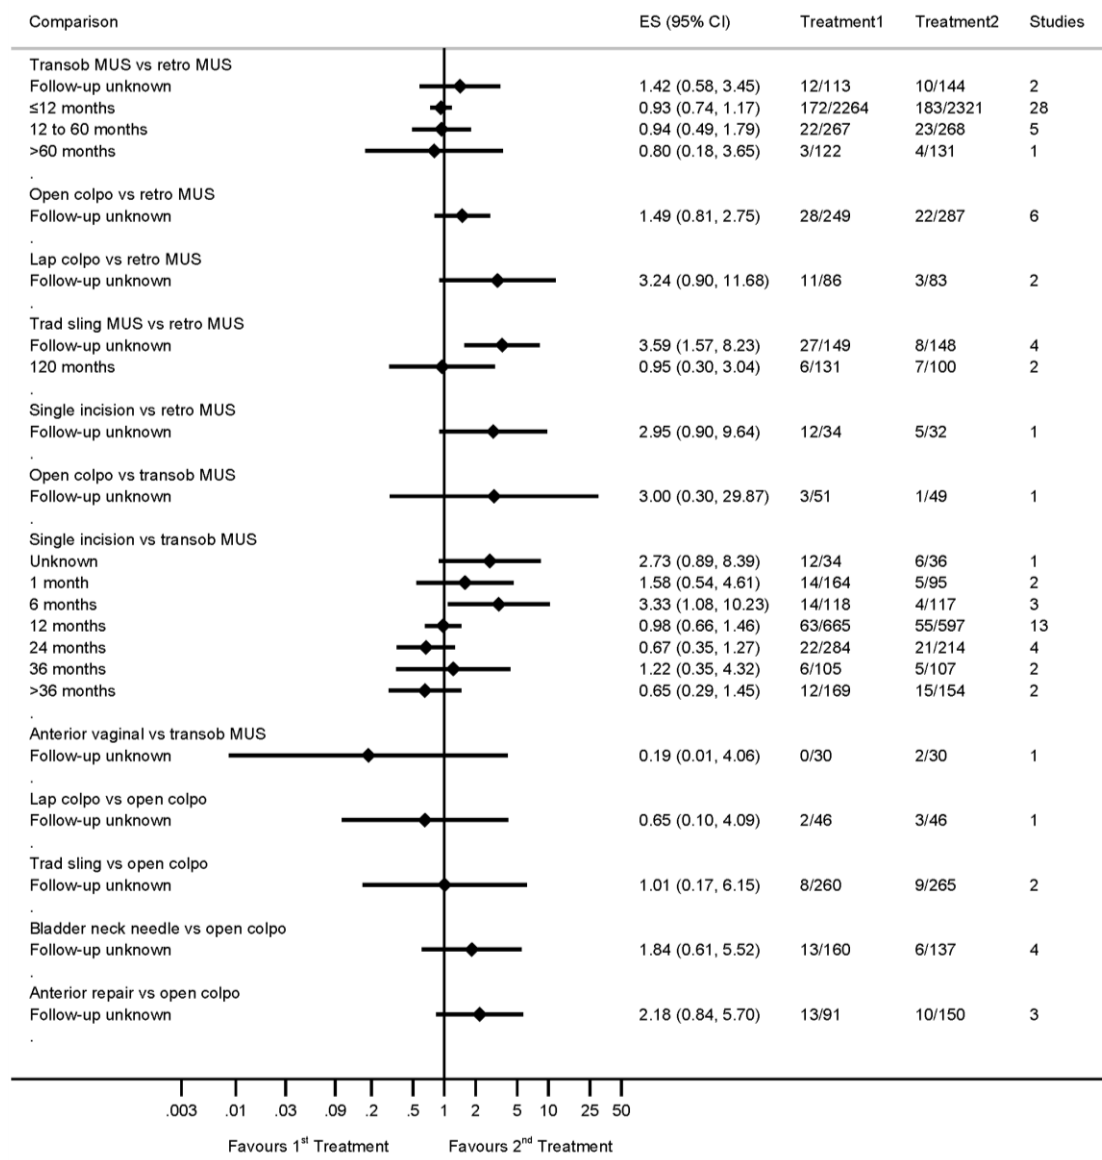

**Figure 5 Meta-analysis for de novo symptoms of urgency or urgency incontinence**

(Effect estimate [ES] = Odds ratio)

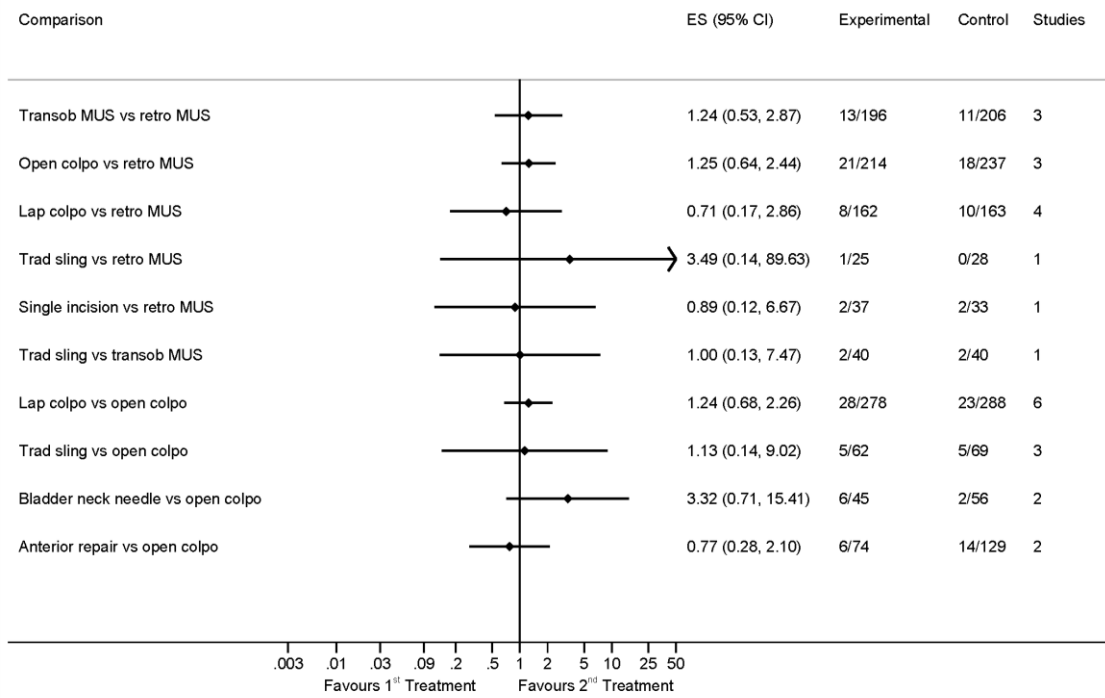

**Figure 6 Meta-analysis for detrusor instability (detrusor overactivity)**

**(Effect estimate [ES] = Odds ratio)**

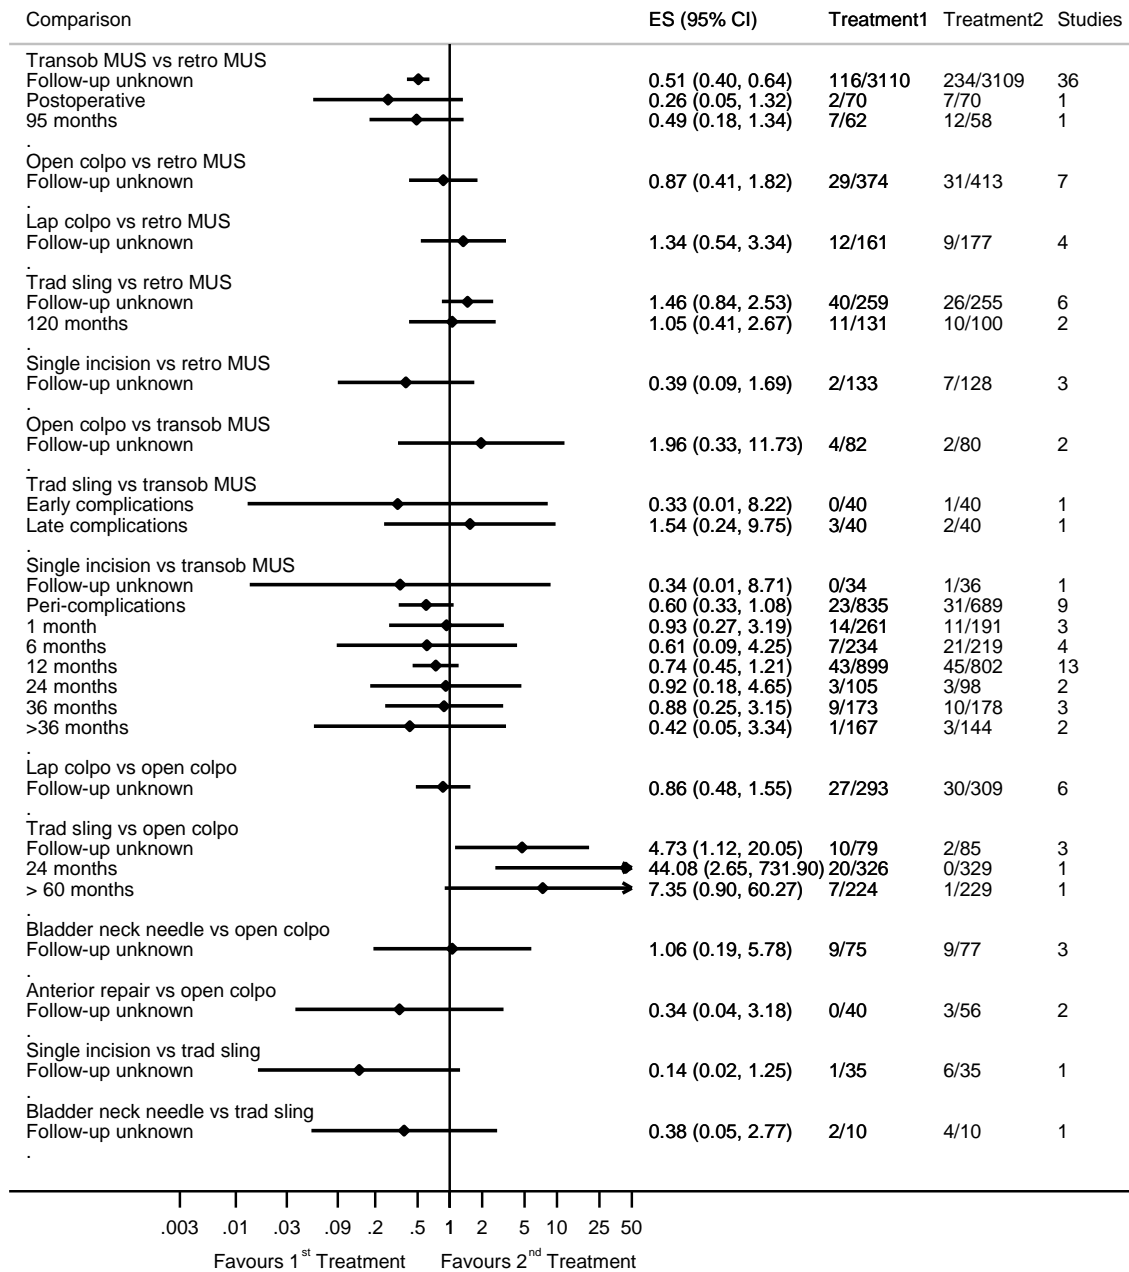

**Figure 71 Meta-analysis for voiding difficulty**

**(Effect estimate [ES] = Odds ratio)**

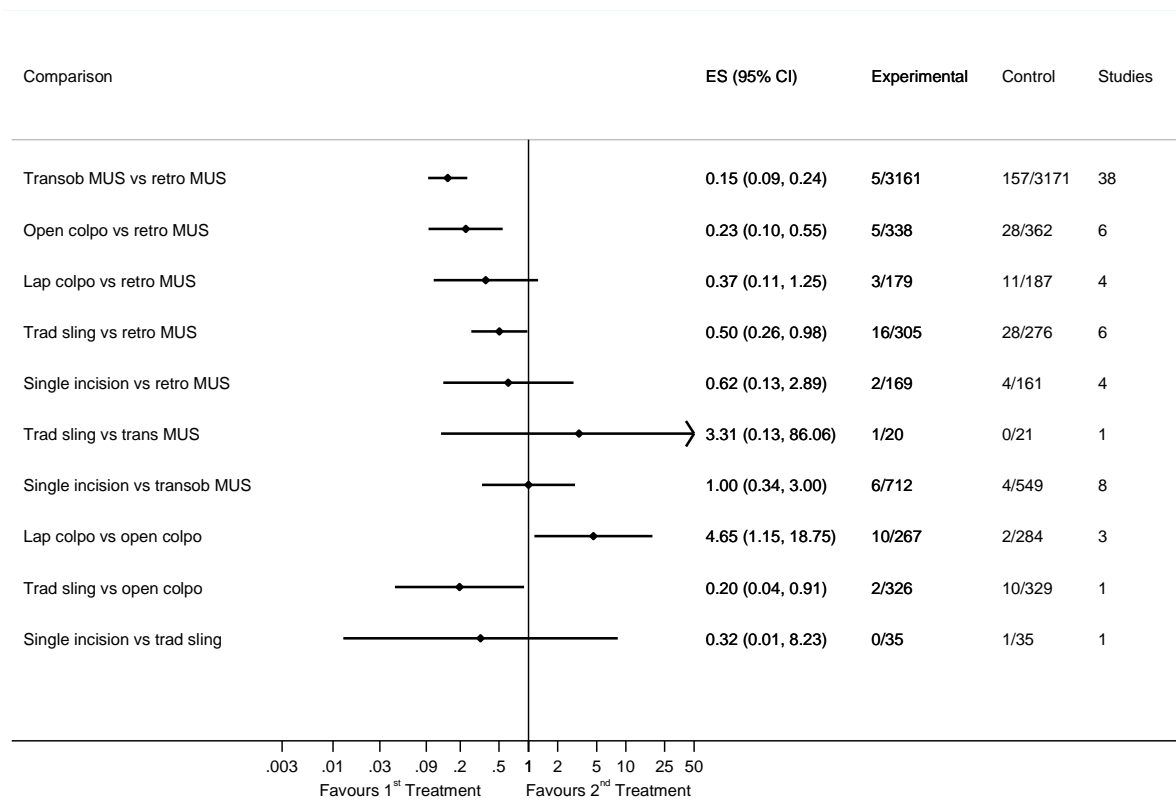

**Figure 8 Meta-analysis for bladder or urethral perforation**

**(Effect estimate [ES] = Odds ratio)**

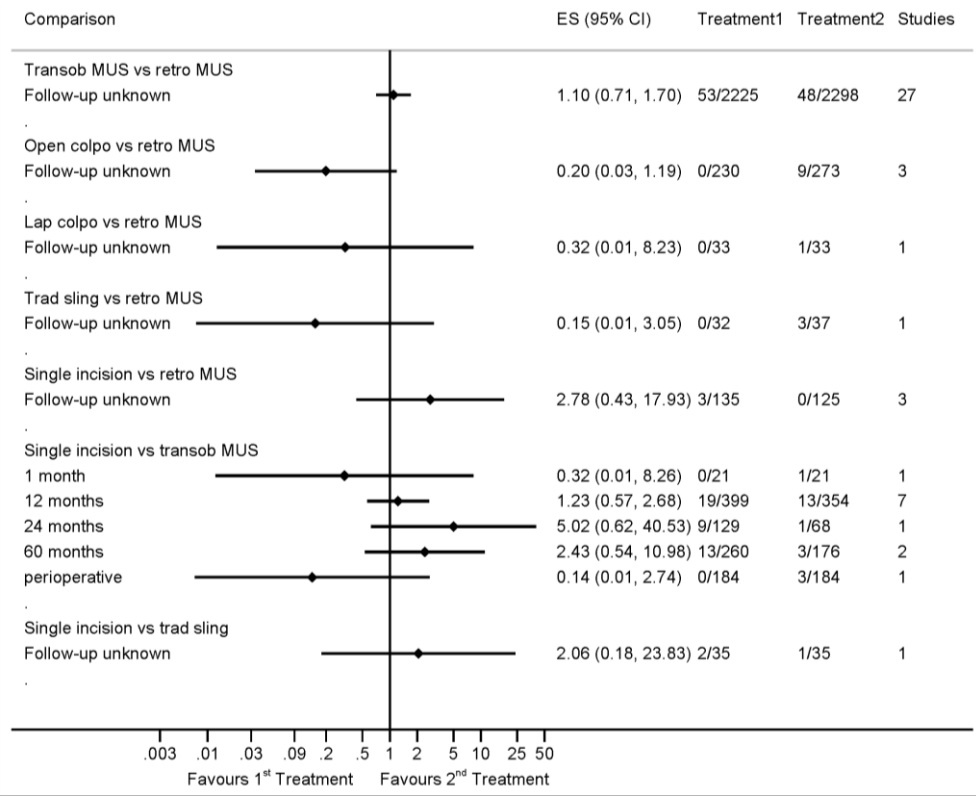

**Figure 9 Meta-analysis for tape/mesh erosion or extrusion**

**(Effect estimate [ES] = Odds ratio)**



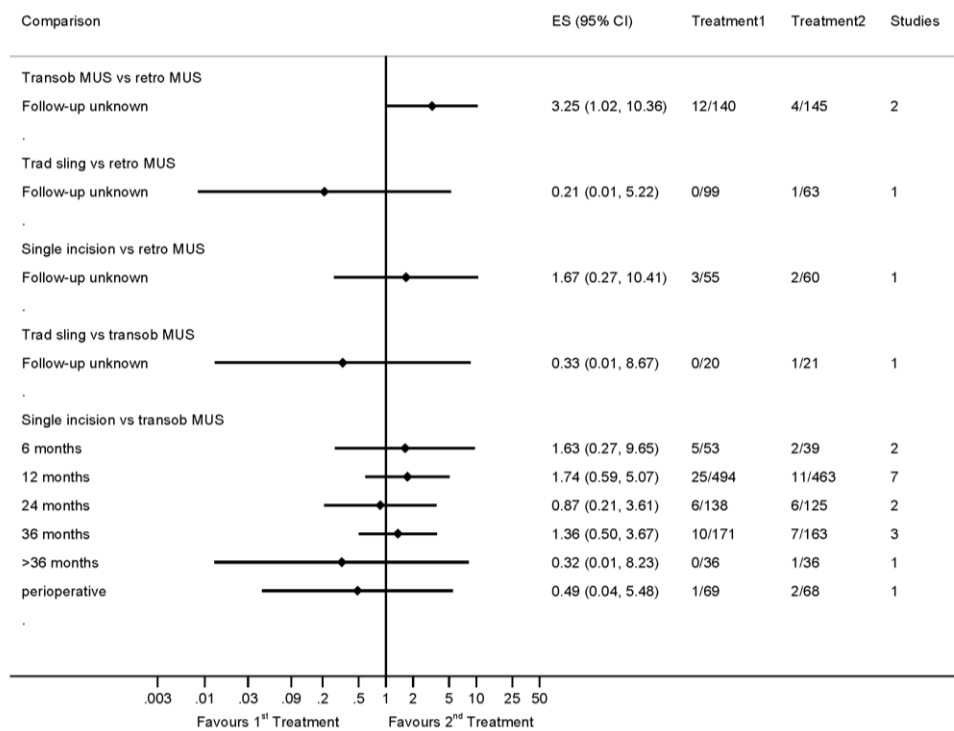

**Figure 102 Meta-analysis for tape/ mesh/implant exposure**

(Effect estimate [ES] = Odds ratio)

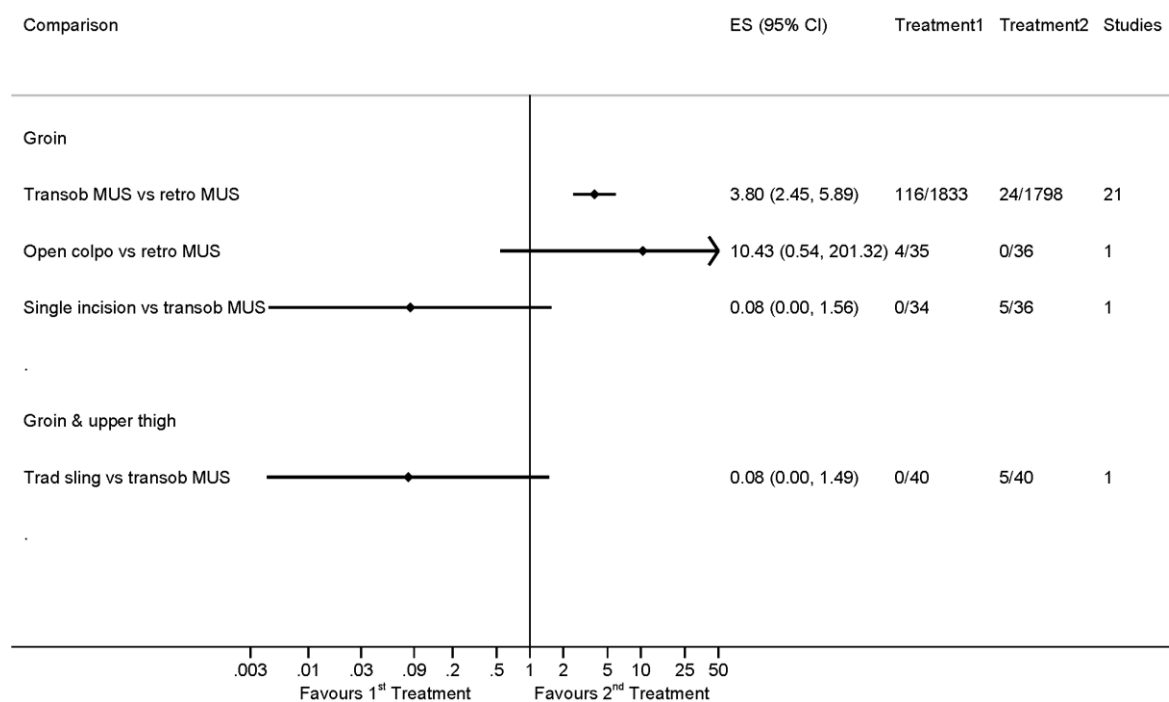

**Figure 11 Meta-analysis for groin pain**

(Effect estimate [ES] = Odds ratio)

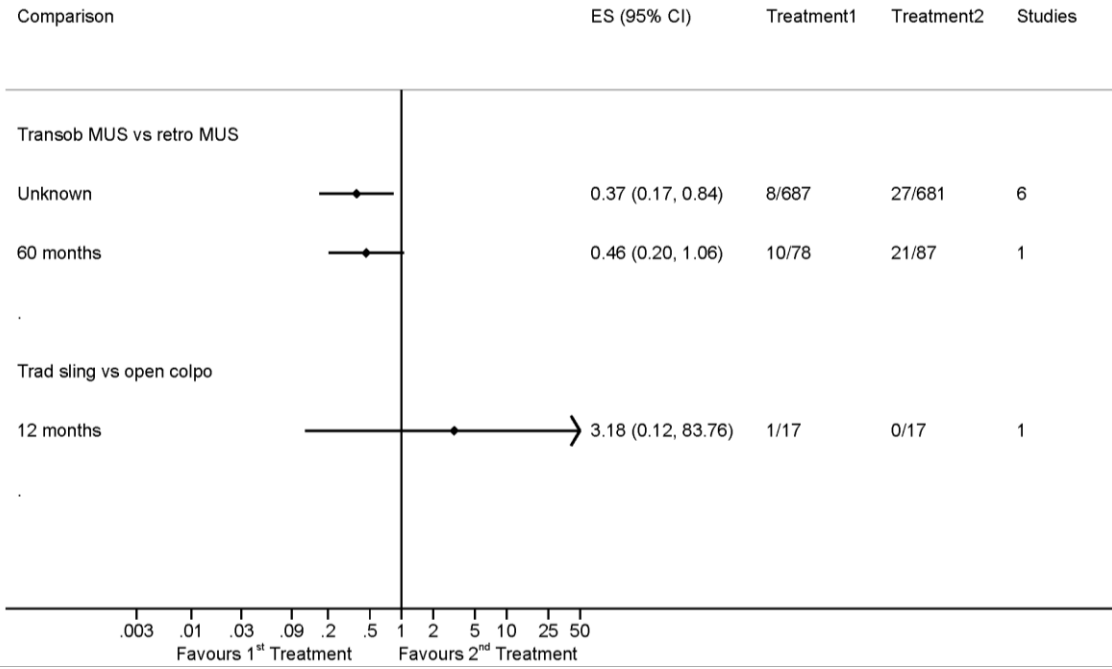

**Figure 12 Meta-analysis for suprapubic pain**

(Effect estimate [ES] = Odds ratio)

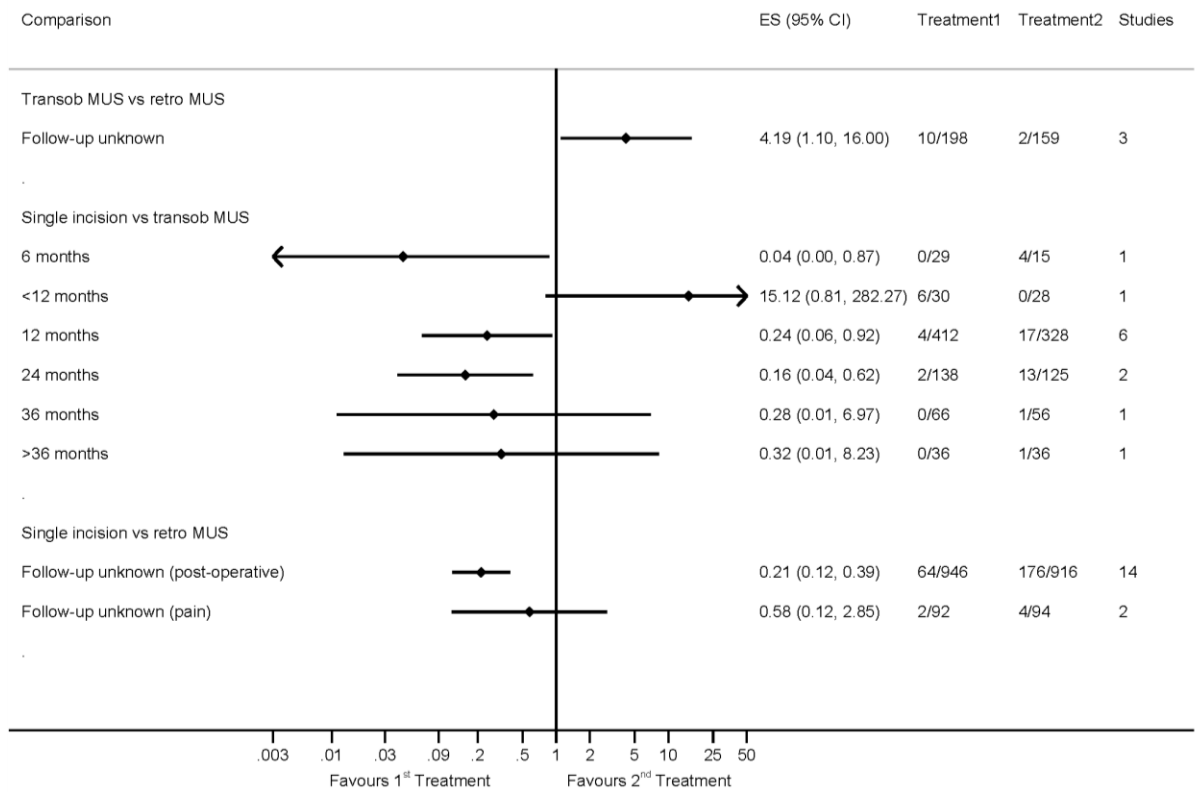

**Figure 13 Meta-analysis for pain**

**(Effect estimate [ES] = Odds ratio)**

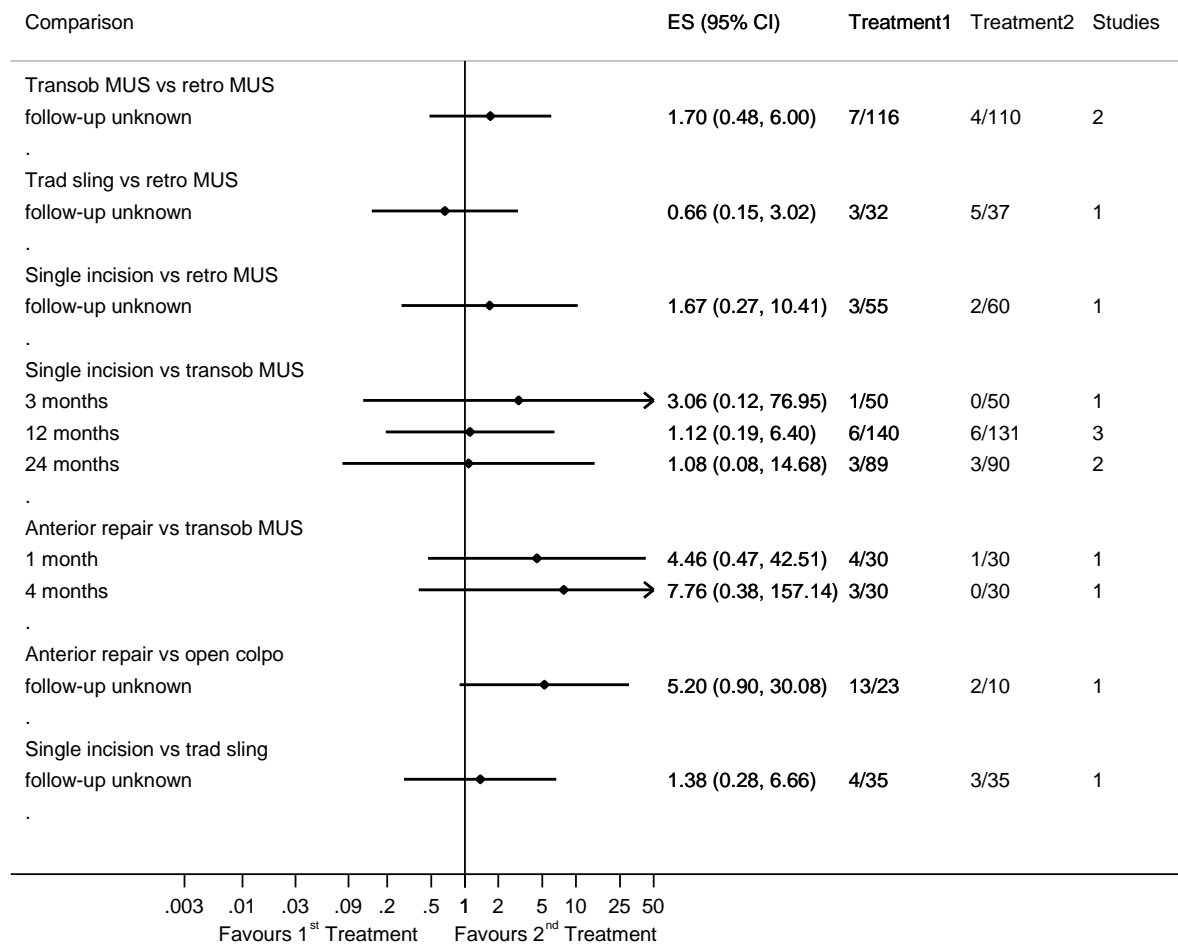

**Figure 14 Meta-analysis for dyspareunia**

**(Effect estimate [ES] = Odds ratio)**

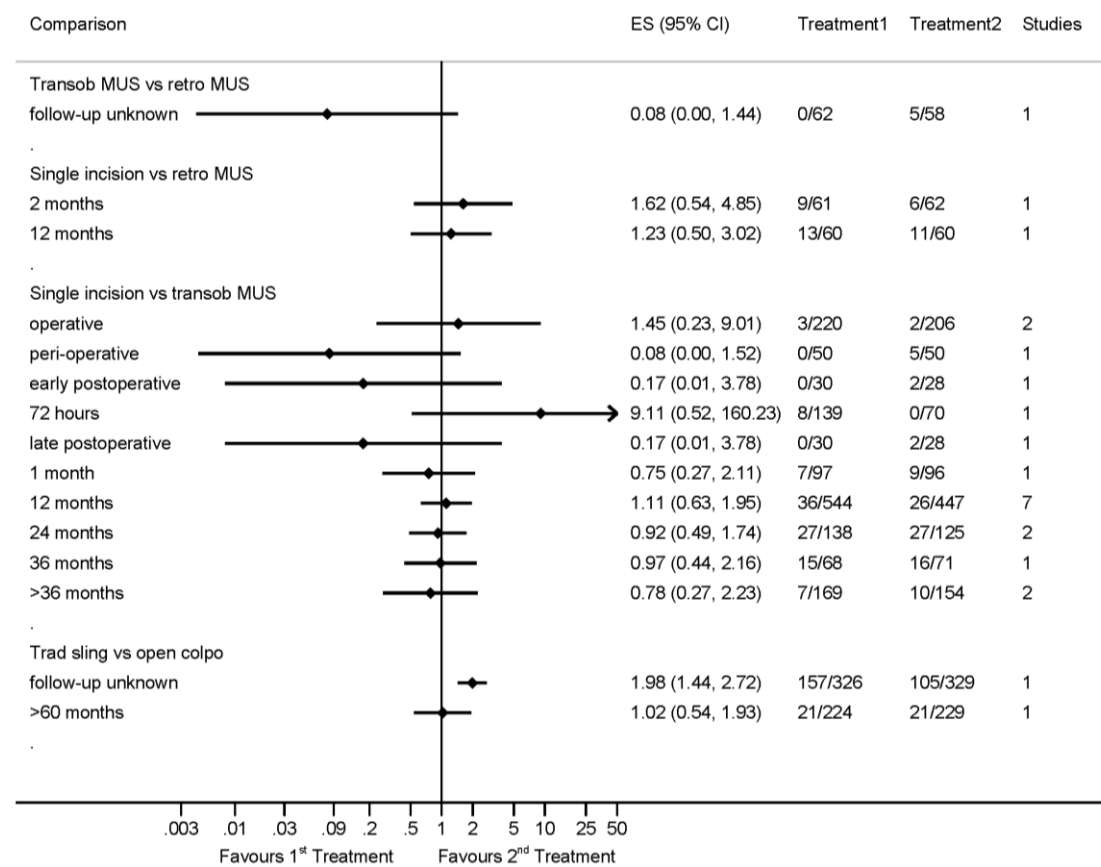

**Figure 15 Meta-analysis for urinary tract infection**

(Effect estimate [ES] = Odds ratio)

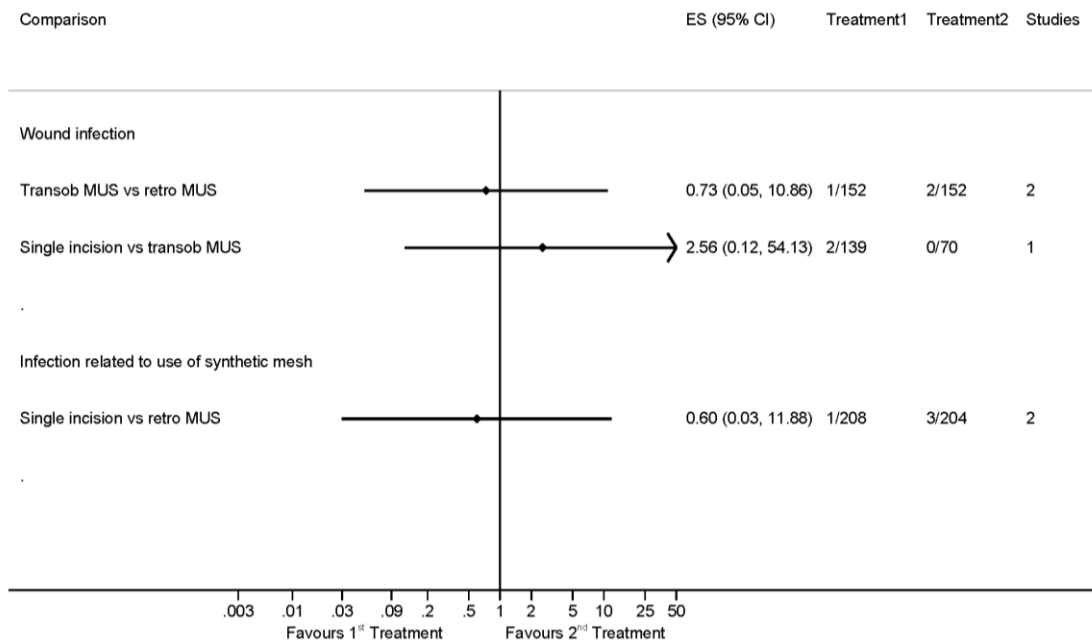

**Figure 163 Meta-analysis for wound infection and infection related to use of synthetic mesh**

(Effect estimate [ES] = Odds ratio)

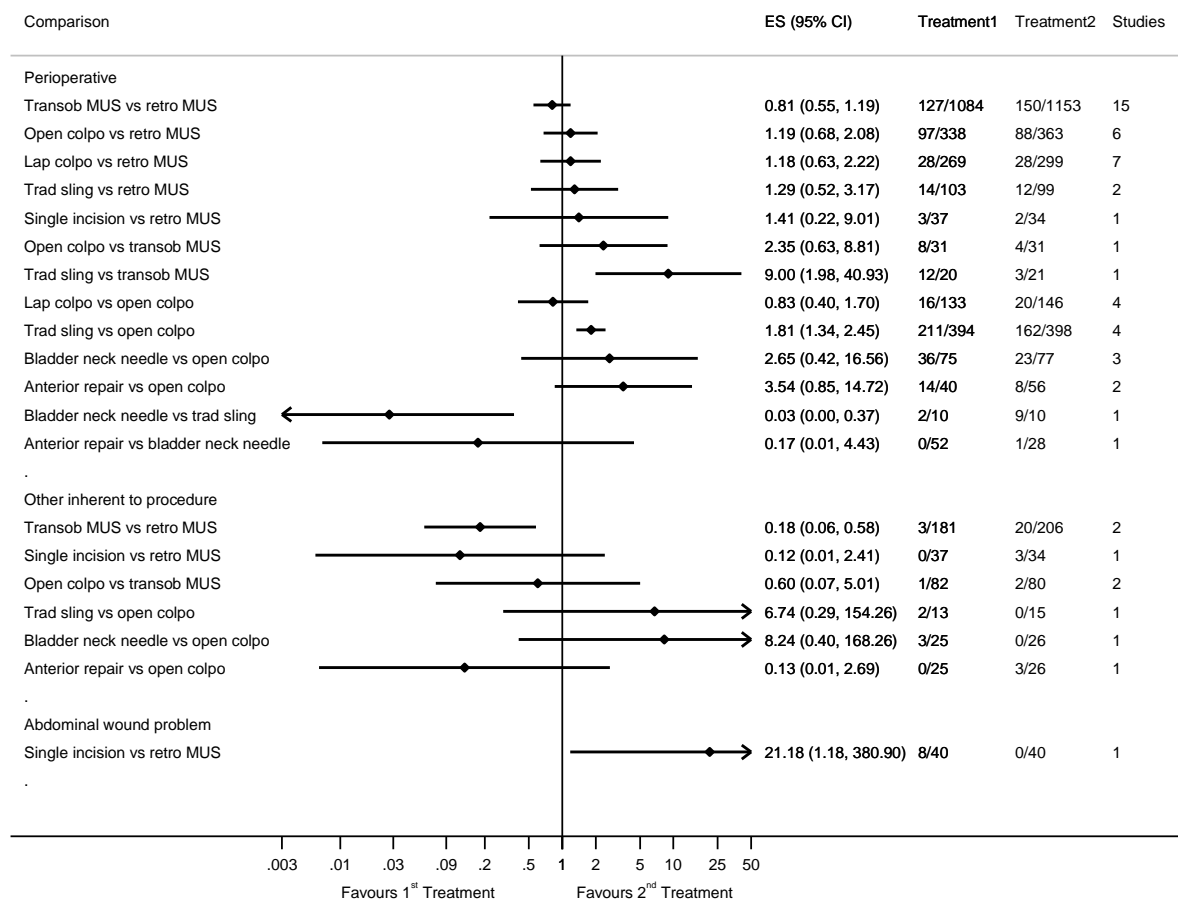

**Figure 17 Meta-analysis for complications**

**(Effect estimate [ES] = Odds ratio)**

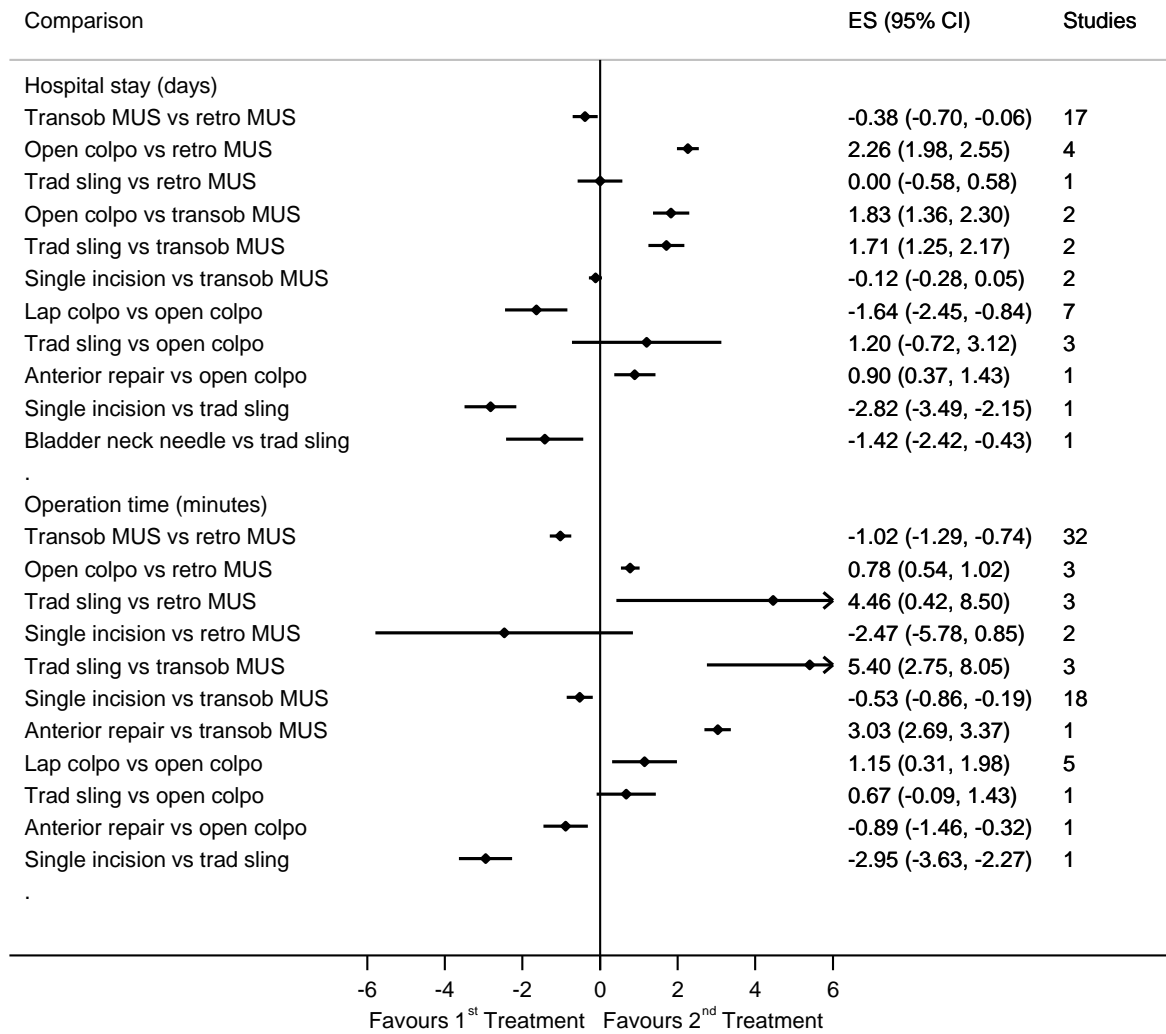

**Figure 18 Meta-analysis for resource utilisation (hospital stay and operation time)**

**(Effect estimate [ES] = Standardised Mean Difference)**
